# Supplementary material
Source: PubMed Central journal article supplement (PMC5203630)
Supplement: AEM.02694-16_zam999117609s1.pdf [file AEM.02694-16_zam999117609s1.pdf]

## Supplementary Material

**Table S1: Corrected P values for Kruskal Wallis test on individual milk samples**

| <b>Milk</b>                                        |                |                  |
|----------------------------------------------------|----------------|------------------|
| <b>NPI vs NPO</b>                                  | <b>P value</b> | <b>Higher in</b> |
| <i>Lactococcus</i>                                 | 0.002          | NPO              |
| <i>Pseudomonas</i>                                 | 0.003          | NPO              |
| <i>Acinetobacter</i>                               | 0.008          | NPO              |
| <i>Eremococcus</i>                                 | 0.012          | NPI              |
| <i>Ruminococcus</i>                                | 0.012          | NPI              |
| <i>Tumebacillus</i>                                | 0.014          | NPO              |
| <i>Prevotella</i>                                  | 0.02           | NPI              |
| <i>Corynebacteriales</i> uncultured bacterium      | 0.022          | NPI              |
| <i>Ruminococcaceae</i> Incertae Sedis              | 0.028          | NPI              |
| <i>Bacteroidales</i> uncultured bacterium          | 0.049          | NPI              |
| <b>NPI vs PI</b>                                   | <b>P value</b> | <b>Higher in</b> |
| <i>Pseudomonas</i>                                 | 0.035          | PI               |
| <b>NPO vs PO</b>                                   | <b>P value</b> | <b>Higher in</b> |
| uncultured <i>Verrucomicrobia</i> bacterium        | 0.005          | PO               |
| <i>Exiguobacterium</i>                             | 0.009          | PO               |
| <i>Pseudomonas</i>                                 | 0.011          | NPO              |
| DA101 soil group uncultured bacterium              | 0.013          | PO               |
| <i>Bifidobacterium</i>                             | 0.02           | NPO              |
| <i>Lactococcus</i>                                 | 0.025          | NPO              |
| Candidate division TM7 uncultured bacterium        | 0.027          | PO               |
| <i>Lactobacillus</i>                               | 0.03           | NPO              |
| <i>Ruminococcaceae</i> Incertae Sedis              | 0.046          | PO               |
| <b>PI vs PO</b>                                    | <b>P value</b> | <b>Higher in</b> |
| <i>Bifidobacterium</i>                             | 0.001          | PI               |
| <i>Eremococcus</i>                                 | 0.001          | PI               |
| <i>Facklamia</i>                                   | 0.001          | PI               |
| <i>Alloiococcus</i>                                | 0.001          | PI               |
| <i>Atopostipes</i>                                 | 0.001          | PI               |
| <i>Trichococcus</i>                                | 0.001          | PI               |
| <i>Carnobacteriaceae</i> uncultured                | 0.002          | PI               |
| DA101 soil group uncultured <i>Verrucomicrobia</i> | 0.002          | PO               |
| <i>Corynebacterium</i>                             | 0.003          | PI               |
| <i>Exiguobacterium</i>                             | 0.003          | PO               |
| DA101 soil group uncultured bacterium              | 0.003          | PO               |
| <i>Lactobacillus</i>                               | 0.004          | PI               |

---

|                                    |       |    |
|------------------------------------|-------|----|
| <i>Ruminococcus</i>                | 0.009 | PI |
| <i>Flavobacterium</i>              | 0.009 | PO |
| <i>Massilia</i>                    | 0.012 | PO |
| <i>Sphingomonas</i>                | 0.014 | PO |
| <i>Psychrobacter</i>               | 0.019 | PI |
| <i>Prevotella</i>                  | 0.02  | PI |
| <i>Candidatus Saccharimonas</i>    | 0.02  | PI |
| <i>Variovorax</i>                  | 0.02  | PO |
| <i>Tumebacillus</i>                | 0.021 | PO |
| <i>Hymenobacter</i>                | 0.022 | PO |
| <i>Dietzia</i>                     | 0.023 | PI |
| <i>Arthrobacter</i>                | 0.028 | PI |
| <i>Clostridium sensu stricto 1</i> | 0.036 | PI |

---

NPI= No prep indoor; NPO=No prep outdoor; PI= Prep indoor; PO= Prep outdoor

**Table S2: Corrected P values for Kruskal Wallis test on teat swab samples**

| <b>Teat</b>                                    |                |                  |
|------------------------------------------------|----------------|------------------|
| <b>NPI vs NPO</b>                              | <b>P value</b> | <b>Higher in</b> |
| <i>Trichococcus</i>                            | 0.012          | NPI              |
| <i>Incertae Sedis</i>                          | 0.013          | NPO              |
| <i>Acidimicrobiales</i> uncultured bacterium   | 0.014          | NPO              |
| <i>Peptostreptococcaceae</i> uncultured        | 0.015          | NPO              |
| <i>Marinospirillum</i>                         | 0.02           | NPI              |
| <i>Proteiniphilum</i>                          | 0.021          | NPI              |
| <i>Erysipelothrix</i>                          | 0.025          | NPI              |
| <i>Exiguobacterium</i>                         | 0.025          | NPO              |
| <i>Corynebacterium</i>                         | 0.039          | NPI              |
| <i>Psychrobacter</i>                           | 0.039          | NPI              |
| <i>Arenimonas</i>                              | 0.039          | NPO              |
| <i>Betaproteobacteria</i> uncultured bacterium | 0.04           | NPO              |
| uncultured <i>Mycobacteriaceae</i> bacterium   | 0.042          | NPO              |
| <i>Xanthomonadales</i> uncultured bacterium    | 0.042          | NPO              |
| <i>Eremococcus</i>                             | 0.044          | NPI              |
| <i>Blastocatella</i>                           | 0.049          | NPO              |
| <i>Verrucomicrobiaceae</i> uncultured          | 0.049          | NPO              |
| <i>Ferruginibacter</i>                         | 0.05           | NPO              |
| <b>NPI vs PI</b>                               | <b>P value</b> | <b>Higher in</b> |
| <i>Variovorax</i>                              | 0.033          | NPI              |
| <i>Bifidobacterium</i>                         | 0.04           | PI               |
| <i>Acidimicrobiales</i> uncultured bacterium   | 0.043          | NPI              |
| <i>Devosia</i>                                 | 0.043          | NPI              |
| <b>NPO vs PO</b>                               | <b>P value</b> | <b>Higher in</b> |
| No significant differences                     | NA             |                  |
| <b>PI vs PO</b>                                | <b>P value</b> | <b>Higher in</b> |
| <i>Proteiniphilum</i>                          | 0.001          | PI               |
| <i>Jeotgalicoccus</i>                          | 0.001          | PI               |
| <i>Eremococcus</i>                             | 0.001          | PI               |
| <i>Facklamia</i>                               | 0.001          | PI               |
| <i>Carnobacteriaceae</i> uncultured            | 0.001          | PI               |
| <i>Erysipelothrix</i>                          | 0.001          | PI               |
| <i>Marinospirillum</i>                         | 0.001          | PI               |
| <i>Blastocatella</i>                           | 0.001          | PO               |
| <i>Acidimicrobiales</i> uncultured bacterium   | 0.001          | PO               |
| uncultured <i>Mycobacteriaceae</i> bacterium   | 0.001          | PO               |
| <i>Dyadobacter</i>                             | 0.001          | PO               |
| <i>Ferruginibacter</i>                         | 0.001          | PO               |
| <i>Devosia</i>                                 | 0.001          | PO               |

|                                                              |       |    |
|--------------------------------------------------------------|-------|----|
| <i>Methylobacterium</i>                                      | 0.001 | PO |
| <i>Variovorax</i>                                            | 0.001 | PO |
| <i>Stenotrophomonas</i>                                      | 0.001 | PO |
| <i>Xanthomonas</i>                                           | 0.001 | PO |
| DA101 soil group uncultured bacterium                        | 0.001 | PO |
| <i>Corynebacterium</i>                                       | 0.002 | PI |
| <i>Ruminococcus</i>                                          | 0.002 | PI |
| <i>Psychrobacter</i>                                         | 0.002 | PI |
| uncultured Acidobacteria bacterium                           | 0.002 | PO |
| <i>Clavibacter</i>                                           | 0.002 | PO |
| <i>Gaiellales</i> uncultured bacterium                       | 0.002 | PO |
| <i>Chitinophagaceae</i> uncultured                           | 0.002 | PO |
| <i>Exiguobacterium</i>                                       | 0.002 | PO |
| <i>Sphingomonas</i>                                          | 0.002 | PO |
| <i>Betaproteobacteria</i> SC.I.84 uncultured bacterium       | 0.002 | PO |
| <i>Arenimonas</i>                                            | 0.002 | PO |
| <i>Xanthomonadales</i> uncultured bacterium                  | 0.002 | PO |
| DA101 soil group uncultured <i>Verrucomicrobia</i> bacterium | 0.002 | PO |
| <i>Verrucomicrobiaceae</i> uncultured                        | 0.002 | PO |
| <i>Bifidobacterium</i>                                       | 0.003 | PI |
| <i>Spirochaetaceae</i> uncultured                            | 0.003 | PI |
| Acidobacteria Subgroup 6 uncultured bacterium                | 0.003 | PO |
| <i>Hymenobacter</i>                                          | 0.003 | PO |
| <i>Pedobacter</i>                                            | 0.003 | PO |
| WD2101 soil group uncultured bacterium                       | 0.003 | PO |
| <i>Rhizobium</i>                                             | 0.003 | PO |
| <i>Chthoniobacter</i>                                        | 0.003 | PO |
| <i>Alloiococcus</i>                                          | 0.004 | PI |
| <i>Trichococcus</i>                                          | 0.004 | PI |
| <i>Rhodococcus</i>                                           | 0.004 | PO |
| <i>Bradyrhizobium</i>                                        | 0.004 | PO |
| <i>Prevotella</i>                                            | 0.005 | PI |
| <i>Brevundimonas</i>                                         | 0.005 | PO |
| <i>Massilia</i>                                              | 0.005 | PO |
| <i>Spirosoma</i>                                             | 0.006 | PO |
| <i>Nocardioides</i>                                          | 0.007 | PO |
| <i>Treponema</i>                                             | 0.009 | PI |
| <i>Kandleria</i>                                             | 0.009 | PO |
| uncultured <i>Parabacteroides</i> sp.                        | 0.011 | PI |
| <i>Blautia</i>                                               | 0.011 | PI |
| <i>Halomonas</i>                                             | 0.015 | PI |
| <i>Cellvibrio</i>                                            | 0.026 | PO |
| <i>Peptostreptococcaceae Incertae Sedis</i>                  | 0.03  | PO |
| <i>Lachnospiraceae</i> uncultured                            | 0.032 | PI |
| <i>Anaerotruncus</i>                                         | 0.032 | PI |

*Comamonadaceae* uncultured

0.047 PO

*Atopobium*

0.05 PO

---

NPI= No prep indoor; NPO=No prep outdoor; PI= Prep indoor; PO= Prep outdoor

**Table S3: Corrected P values for Kruskal Wallis test on faecal samples**

| <b>Faeces</b>                           | <b>P value</b> | <b>Higher in</b> |
|-----------------------------------------|----------------|------------------|
| <i>Prevotella</i>                       | 0.001          | Indoor           |
| <i>Bacteroides</i>                      | 0.002          | Indoor           |
| <i>Saprospiraceae</i> uncultured        | 0.002          | Indoor           |
| RF16 uncultured bacterium               | 0.005          | Outdoor          |
| <i>Incertae Sedis</i>                   | 0.005          | Outdoor          |
| <i>Ruminococcaceae</i> uncultured       | 0.009          | Outdoor          |
| <i>Lachnospiraceae</i> uncultured       | 0.012          | Indoor           |
| <i>Phascolarctobacterium</i>            | 0.012          | Indoor           |
| <i>Sutterella</i>                       | 0.012          | Indoor           |
| <i>Ruminobacter</i>                     | 0.012          | Indoor           |
| <i>Spirochaetaceae</i> uncultured       | 0.012          | Indoor           |
| uncultured <i>Parabacteroides</i> sp.   | 0.021          | Indoor           |
| <i>Ruminococcus</i>                     | 0.021          | Indoor           |
| <i>Treponema</i>                        | 0.021          | Indoor           |
| RF9 uncultured bacterium                | 0.021          | Indoor           |
| <i>Peptostreptococcaceae</i> uncultured | 0.021          | Outdoor          |
| <i>Fibrobacter</i>                      | 0.027          | Indoor           |
| <i>Incertae Sedis</i>                   | 0.027          | Indoor           |
| <i>Phocaeicola</i>                      | 0.027          | Outdoor          |
| <i>Alloprevotella</i>                   | 0.027          | Outdoor          |
| <i>Paludibacter</i>                     | 0.036          | Outdoor          |
| <i>Prevotellaceae</i> uncultured        | 0.036          | Outdoor          |
| <i>Blautia</i>                          | 0.046          | Indoor           |

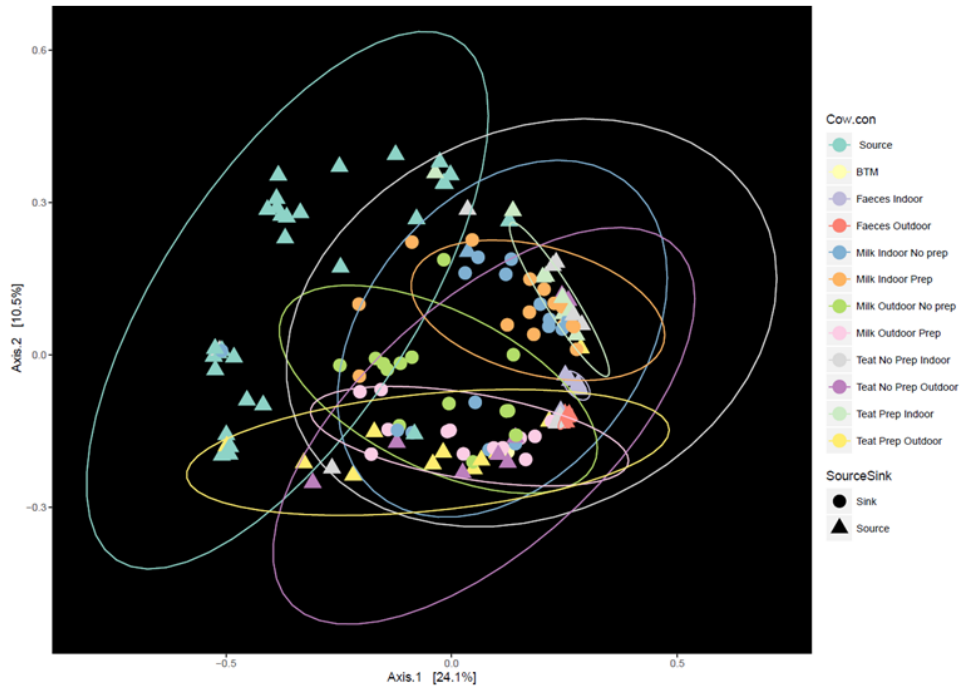

Fig S1: Bray-Curtis PCoA of all samples coloured by farming practice and shaped based on source or sink. The cyan colour indicates environmental samples (soil, bedding, grass and silage).

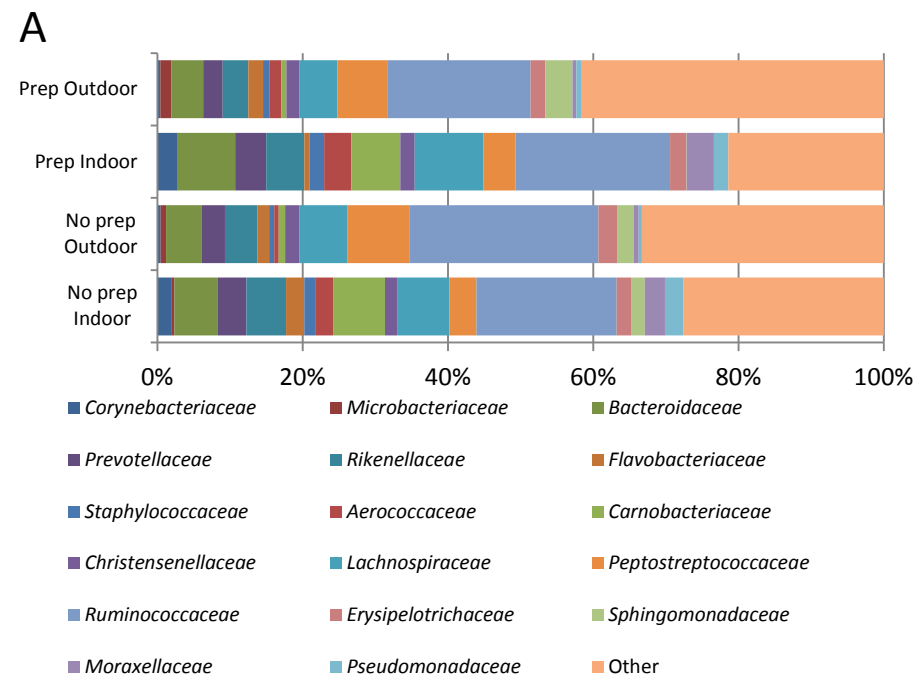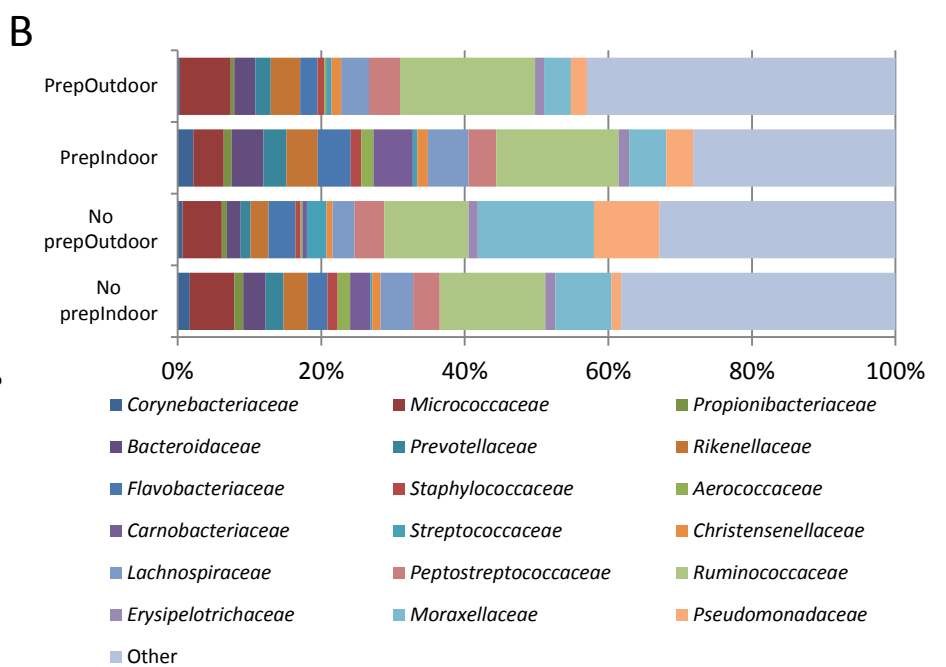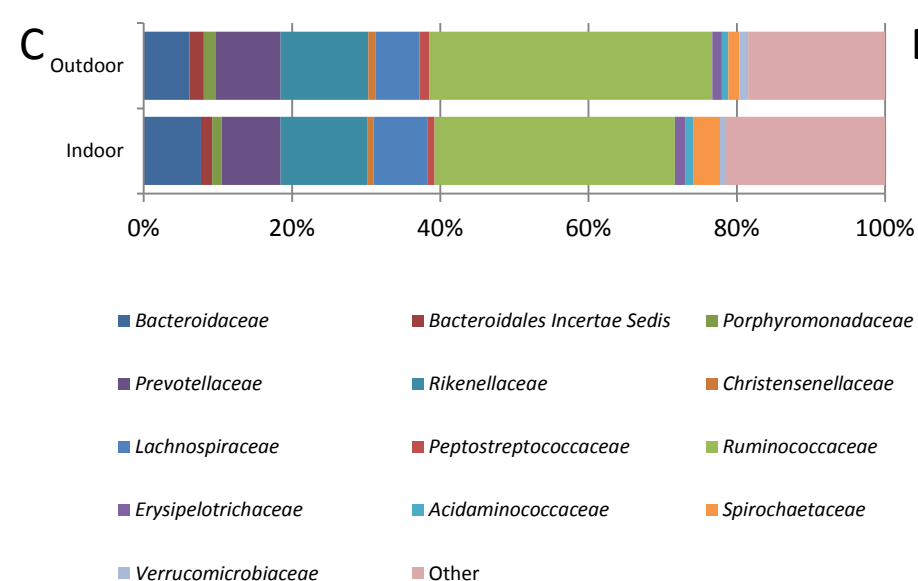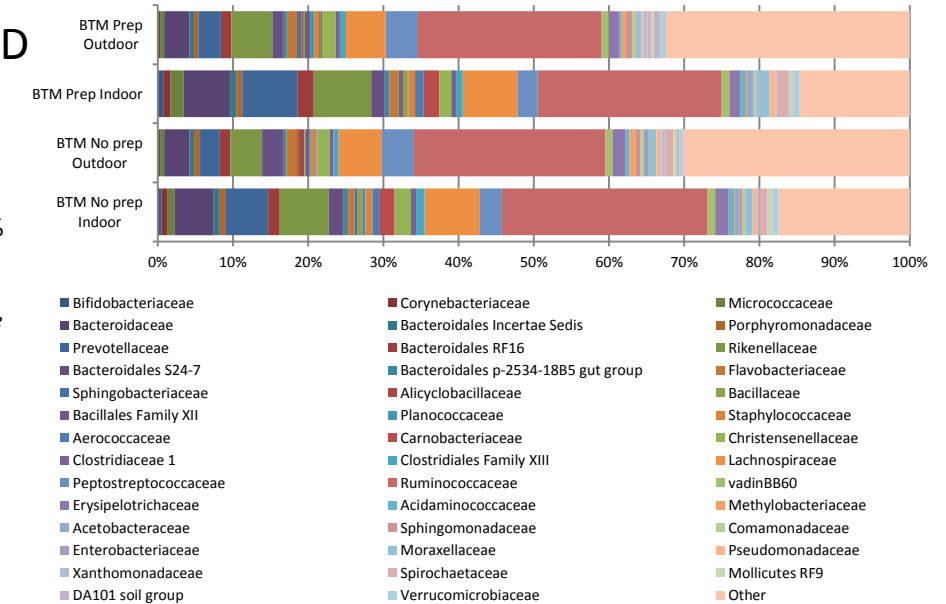

Supplementary Figure 2: Family present in (A) teat surface samples, (B) individual milk samples, (C) faecal samples and (D) BTM samples



**A**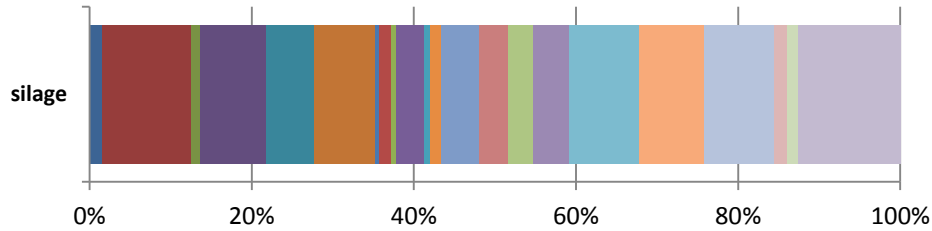

- *Porphyromonadaceae*
- *Prevotellaceae*
- *Cryomorphaceae*
- *Flavobacteriaceae*
- *Sphingobacteriaceae*
- *Bacillaceae*
- *Paenibacillaceae*
- *Planococcaceae*
- *Enterococcaceae*
- *Lactobacillaceae*
- *Ruminococcaceae*
- *Erysipelotrichaceae*
- *Acetobacteraceae*
- *Alcaligenaceae*
- *Comamonadaceae*
- *Campylobacteraceae*
- *Enterobacteriaceae*
- *Moraxellaceae*
- *Pseudomonadaceae*
- *Xanthomonadaceae*
- *Acholeplasmataceae*
- *Other*

**B**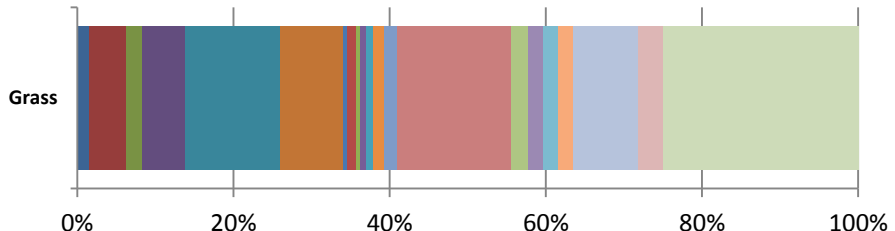

- *Nocardiaceae*
- *Microbacteriaceae*
- *Micrococcaceae*
- *Cytophagaceae*
- *Flavobacteriaceae*
- *Sphingobacteriaceae*
- *Planococcaceae*
- *Ruminococcaceae*
- *Caulobacteraceae*
- *Aurantimonadaceae*
- *Methylobacteriaceae*
- *Rhizobiaceae*
- *Rickettsiales mitochondria*
- *Sphingomonadaceae*
- *Comamonadaceae*
- *Oxalobacteraceae*
- *Enterobacteriaceae*
- *Moraxellaceae*
- *Pseudomonadaceae*
- *Xanthomonadaceae*
- *Other*

**C**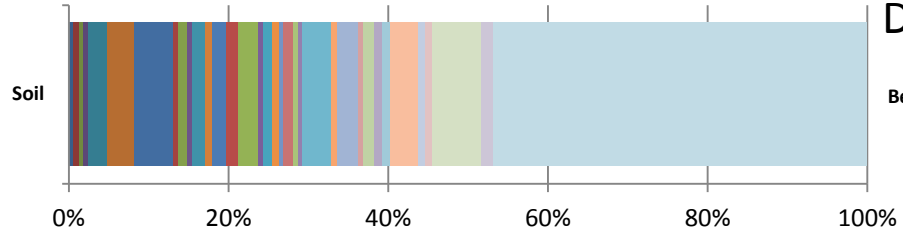

- *Acidimicrobiaceae*
- *Microbacteriaceae*
- *Micrococcaceae*
- *Nocardiodiaceae*
- *Cytophagaceae*
- *Flavobacteriaceae*
- *Chitinophagaceae*
- *Saprospiraceae*
- *Sphingobacteriaceae*
- *Family XII*
- *Planococcaceae*
- *Sphingobacteriales env.OPS 17*
- *Ruminococcaceae*
- *Gemmatimonadaceae*
- *Planctomycetaceae*
- *Caulobacteraceae*
- *Bradyrhizobiaceae*
- *Hyphomicrobiaceae*
- *Rhizobiales Incertae Sedis*
- *Xanthobacteraceae*
- *Rhodospirillales Incertae Sedis*
- *Erythrobacteraceae*
- *Sphingomonadaceae*
- *Alcaligenaceae*
- *Comamonadaceae*
- *Oxalobacteraceae*
- *Nitrosomonadaceae*
- *Haliangiaceae*
- *Pseudomonadaceae*
- *Xanthomonadaceae*
- *Opitutaceae*
- *Chthoniobacteraceae*
- *DA101 soil group*
- *Verrucomicrobiaceae*
- *Other*

**D**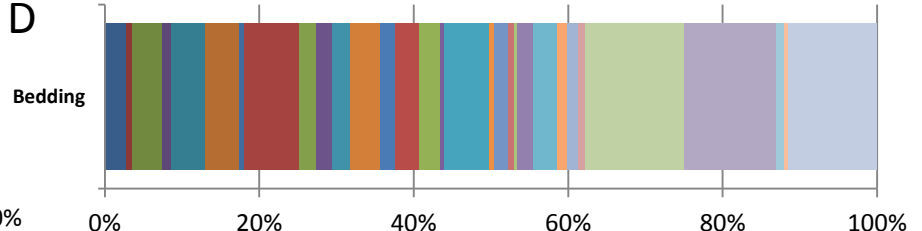

- *Corynebacteriaceae*
- *Micrococcaceae*
- *Bacteroidaceae*
- *Porphyromonadaceae*
- *Prevotellaceae*
- *Rikenellaceae*
- *Cryomorphaceae*
- *Flavobacteriaceae*
- *Sphingobacteriaceae*
- *Bacillaceae*
- *Planococcaceae*
- *Staphylococcaceae*
- *Aerococcaceae*
- *Carnobacteriaceae*
- *Lachnospiraceae*
- *Peptostreptococcaceae*
- *Ruminococcaceae*
- *vadinBB60*
- *Erysipelotrichaceae*
- *Acidaminococcaceae*
- *Comamonadaceae*
- *Idiomarinaceae*
- *Pseudoalteromonadaceae*
- *Chromatiaceae*
- *Enterobacteriaceae*
- *Halomonadaceae*
- *Moraxellaceae*
- *Pseudomonadaceae*
- *Spirochaetaceae*
- *Acholeplasmataceae*
- *Other*

Supplementary Figure 3: Family present in environmental samples, (A) Silage, (B) Grass, (C) Soil and (D) Bedding samples
